# Supplementary material for: Toward Improved Lifetimes of Organic Solar Cells under Thermal Stress: Substrate-Dependent Morphological Stability of PCDTBT:PCBM Films and Devices
Source: PubMed Central journal article supplement (PMC4606801; doi:10.1038/srep15149), 2015-10-15
Supplement: srep15149-s1.pdf [file srep15149-s1.pdf]

## Supplementary Information

# Toward Improved Lifetimes of Organic Solar Cells under Thermal Stress: Substrate-Dependent Morphological Stability of PCDTBT:PCBM Films and Devices

Zhe Li<sup>1,4</sup>, Kar Ho Chiu<sup>1,2</sup>, Raja Shahid Ashraf<sup>1</sup>, Sarah Fearn<sup>3</sup>, Rajeev Dattani<sup>2</sup>, Him Cheng Wong<sup>2,5</sup>, Ching-Hong Tan<sup>1,4</sup>, Jiaying Wu<sup>1</sup>, João T. Cabral<sup>2\*</sup> and James R. Durrant<sup>1,4\*</sup>

<sup>1</sup> Department of Chemistry, Centre for Plastic Electronics, Imperial College London, London SW7 2AZ.

<sup>2</sup> Department of Chemical Engineering, Centre for Plastic Electronics, Imperial College London, London SW7 2AZ.

<sup>3</sup> Department of Materials, Centre for Plastic Electronics, Imperial College London, London SW7 2AZ.

<sup>4</sup> SPECIFIC, College of Engineering, Swansea University, Baglan Bay Innovation, Knowledge Centre, Central Avenue, Baglan SA12 7AX.

<sup>5</sup> Engineering Product Development, Singapore University of Technology and Design, 8 Somapah Road, 487372 Singapore.

\* j.cabral@imperial.ac.uk, j.durrant@imperial.ac.uk.

+these authors contributed equally to this work

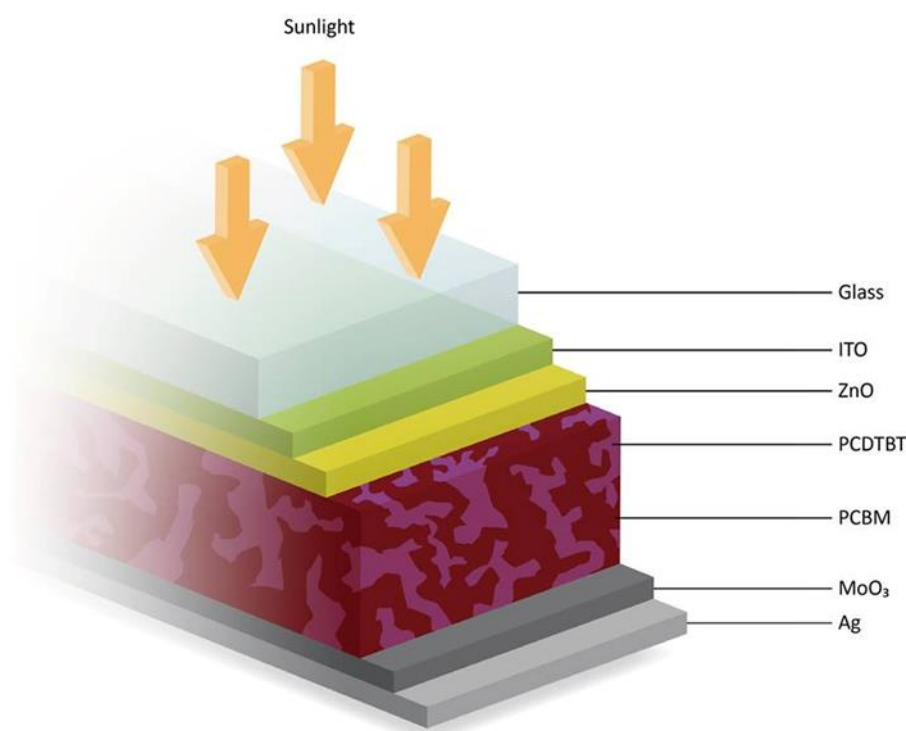

**Figure S1.** Organic solar cell configuration of inverted ZnO devices.

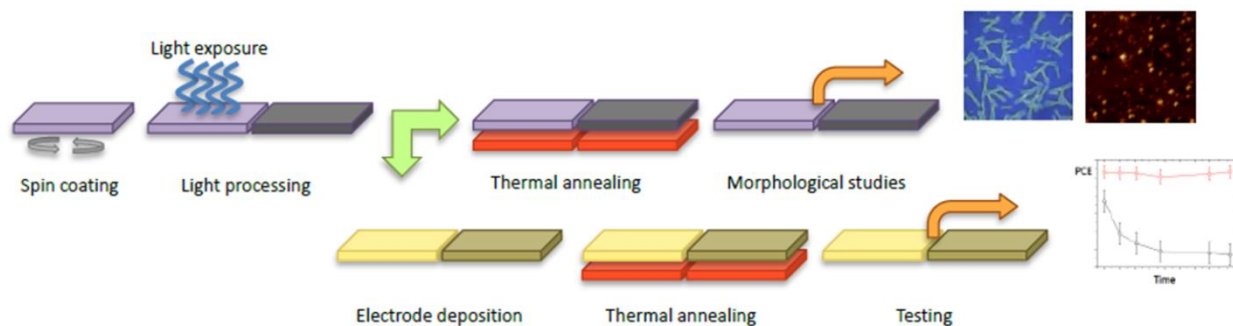

**Figure S2.** Protocol followed in this work for morphological quantification (top row) and device performance evaluation (bottom row).

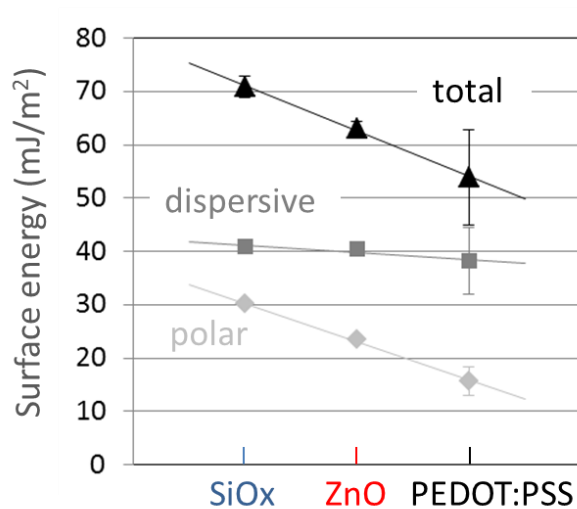

**Figure S3.** Surface energy of substrates SiOx, ZnO, PEDOT:PSS, including polar and dispersive contributions. The larger uncertainty for PEDOT:PSS likely arises from environmental conditions/hygroscopy.

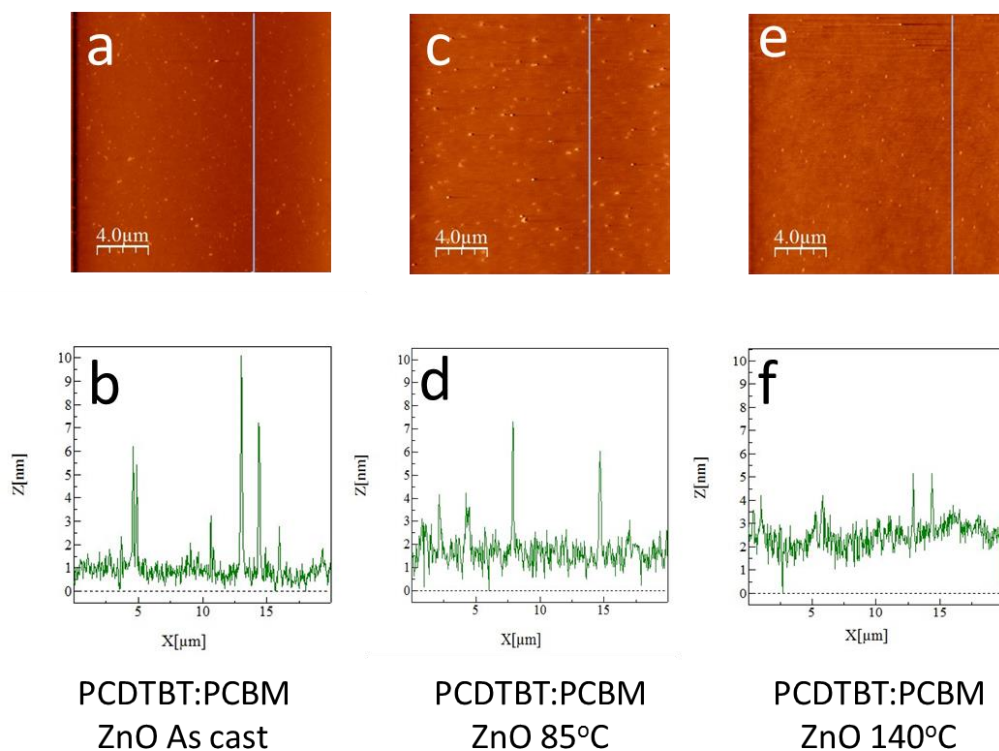

**Figure S4.** Line scans of AFM images of PCDTBT:PC<sub>60</sub>BM (1:2) blend films without thermal annealing (a,b), blend films thermally annealed at 85°C (c,d) and 140°C (e,f) on ZnO substrates. The RMS roughness was measured as 2.03nm, 1.06nm and 0.74nm for as cast blend films, blend films thermally annealed at 85°C, and blend films thermally annealed at 140°C respectively.

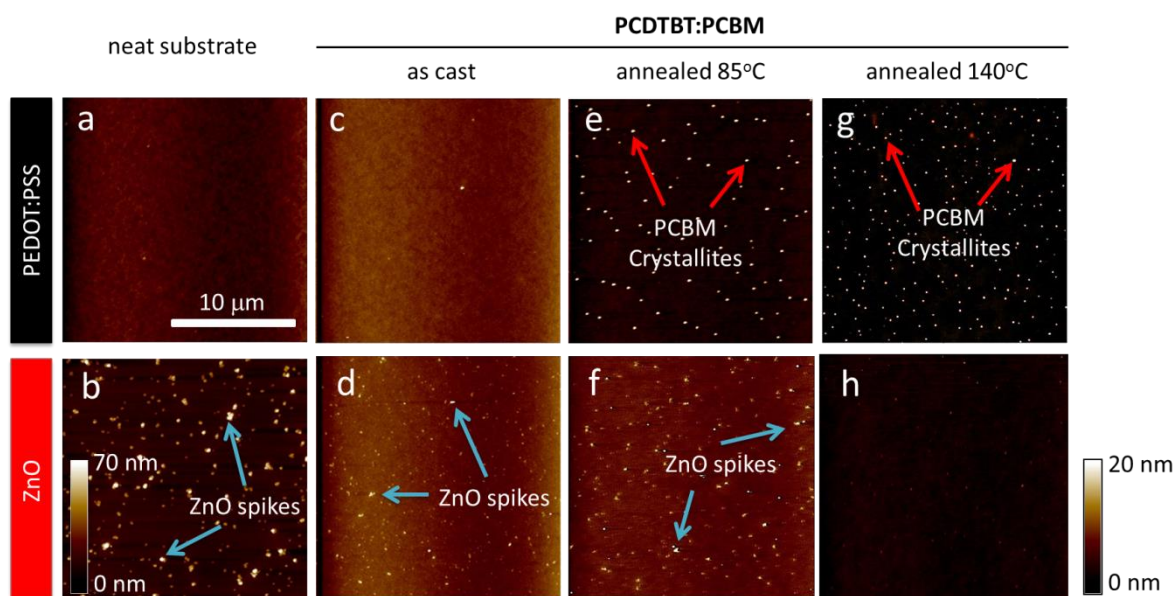

**Figure S5.** AFM images with arrows distinguishing nanoscale ZnO features and PC<sub>60</sub>BM crystallites.

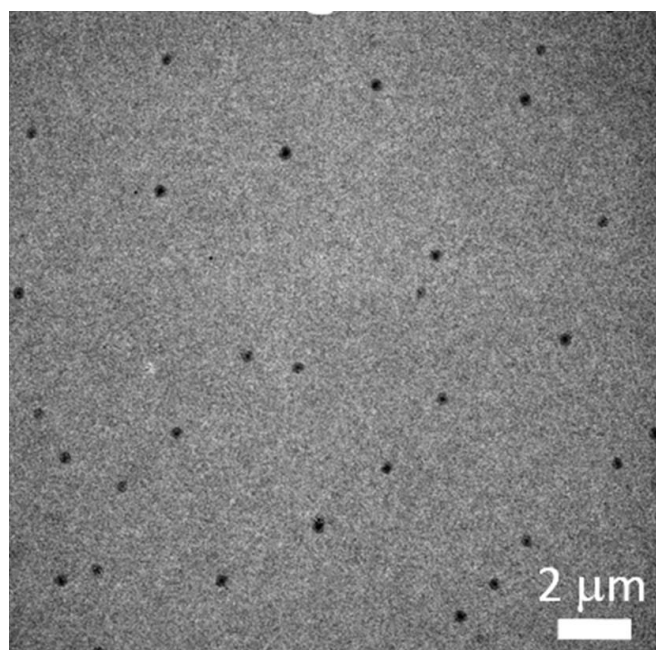

**Figure S6.** TEM image of thermally annealed PCDTBT:PC<sub>60</sub>BM blend films on PEDOT:PSS; the greater contrast of the image corresponds to the large mass and electron density expected for PCBM (approx. 1.5 g/cm<sup>3</sup>) compared to the polymer.

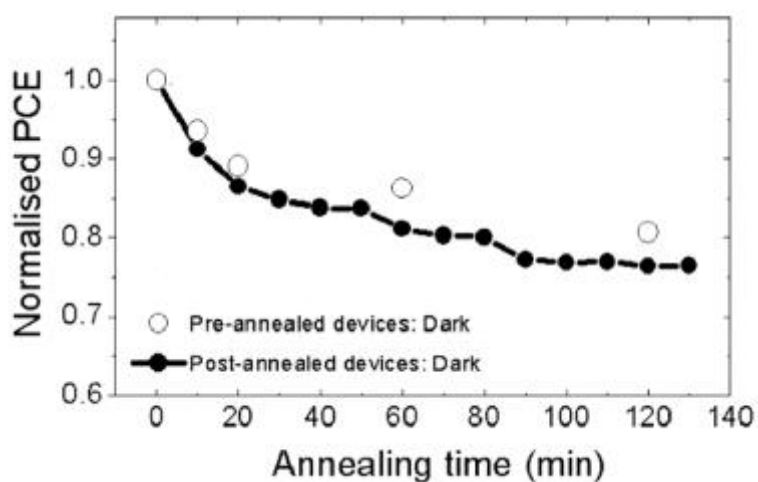

**Figure S7.** Systematic comparison of thermal ageing of pre- and post-annealed devices to deconvolute the effects of top interface layer/electrode and morphological changes on thermal degradation of OPV devices. This figure shows that both pre- and post-annealed devices show similar thermal stability behavior under thermal stress, inferring that the influence of top electrode on device thermal stability is insignificant, at least for the high  $T_g$  PCDTBT based blend system studied herein.

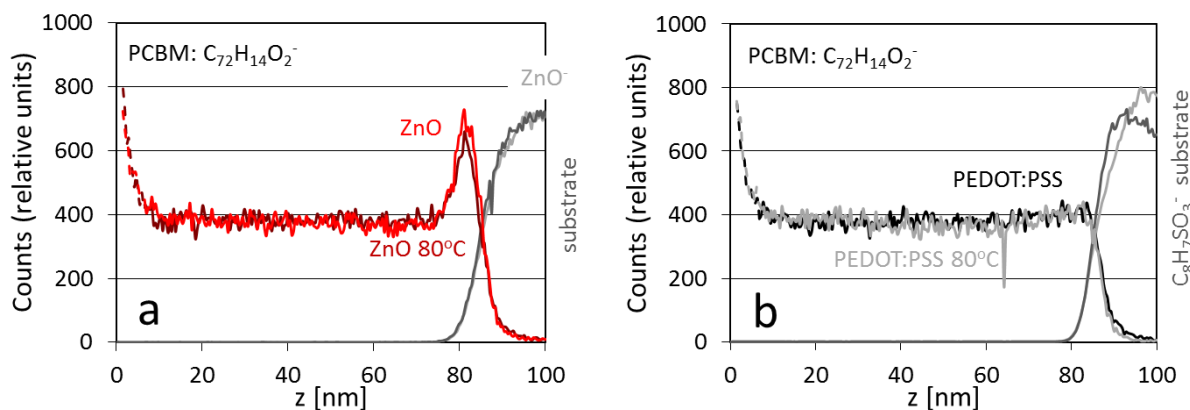

**Figure S8.** TOF-SIMS results for PCDTBT:PCBM (1:2) films on (a) ZnO and (b) PEDOT:PSS substrates upon thermal annealing at 80°C for 1h. The PCBM content is traced by the  $C_{72}H_{14}O_2^-$  signal along the depth [z] of the film. The substrates are located by the ZnO-, SiO<sub>2</sub> and C<sub>8</sub>H<sub>7</sub>SO<sub>3</sub><sup>-</sup> signals for ZnO, SiO<sub>x</sub> and PEDOT:PSS respectively, and are shown in relative units, commensurate with the  $C_{72}H_{14}O_2^-$  trace. No significant changes of PCBM segregation profile as observed on either substrate: (a) PCBM remains segregated to the ZnO interface is observed, and marginally to the PEDOT:PSS interface.

**Neutron reflectivity** measurements were performed on the D17 reflectometer at Institut Laue-Langevin (ILL), Grenoble, in time-of-flight (TOF) mode using a wavelength range of 2 Å to 20 Å ( $\Delta\lambda/\lambda \sim 4\%$ ) and two incident angles of incidence (0.6 and 2.4 °), obtaining a wavenumber  $qz$  window of  $0.004 < qz < 0.22 \text{ \AA}^{-1}$ . Data analyzed using Parratt32 (v 1.6, HMI Berlin).

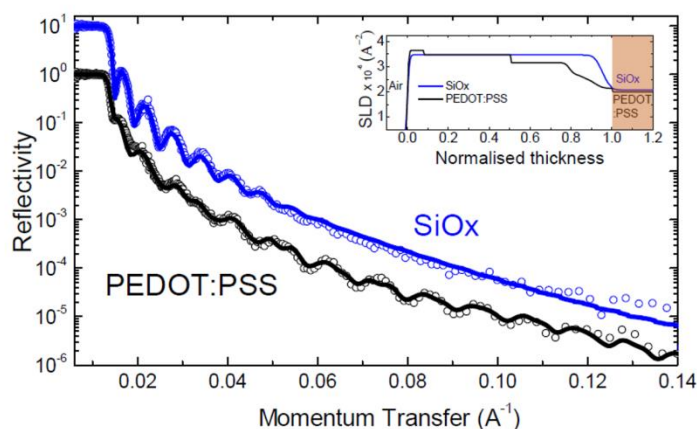

**Figure S9.** Neutron reflectivity profiles of PCDTBT:PC<sub>60</sub>BM films spun cast on SiO<sub>x</sub> and PEDOT:PSS substrates. Inset shows the corresponding scattering length density (SLD) profiles showing a broadly uniform PCBM profile in SiO<sub>x</sub> and an asymmetrically segregated profile (towards the air interface) on PEDOT:PSS.
